# Supplementary material for: Survival predictors of lung cancer patients in ICU: the importance of acute kidney injury prediction and prevention
Source: PeerJ. 2025 Aug 29;13:e19885. doi: 10.7717/peerj.19885 (PMC12401016; doi:10.7717/peerj.19885)
Supplement: Supplemental Information 1 [file peerj-13-19885-s001.xlsx]

## Sheet: sheet
Hospital ID	tumor diagnosis	age	gender	height (cm)	weight (kg)	BMI	monotherapy targeted therapy	combination chemotherapy and targeted therapy	chemotherapy exemption	targeted immunotherapy	chemotherapy history	monotherapy chemotherapy	history of targeted therapy	history of immunotherapy	chemotherapy immunotherapy	monotherapy immunotherapy	history of radiotherapy	transfer source	elective or emergency surgery	surgery status	planned transfer status	surgical patient source	scoring group	APACHE score	SOFA score	sepsis	infection diagnosis	site of infection	thoracic infection	abdominal infection	pulmonary infection	gastroenteritis	skin and soft tissue infection	urinary tract infection	bloodstream infection	antibiotic therapy for infection	carbapenems	β-lactams	glycopeptides	tigecycline	echinocandins	triazoles	other antibiotics	respiratory failure	ARDS	ARDS grading	oxygen therapy regimen	conventional oxygen therapy	high-flow oxygen therapy
1	Lung cancer	76	1	170	47	16.263	0	0	0	0	1	1	0	0	0	0	0	3	0	0	1	0	2	15	4	1	1	Lung	0	0	1	0	0	0	0	Carbapenems, polymyxins	1	0	0	0	1	0	0	1	0	0	Conventional Oxygen Therapy, High Flow, Invasive Ventilation	1	1
1	Lung cancer	65	1	160	50	19.5312	0	0	0	0	1	1	0	0	0	0	0	3	0	0	1	0	2	31	5	1	3	Lung	0	0	1	0	0	0	0	Carbapenems, triazoles	1	0	0	0	0	1	0	1	0	0	High Flow	0	1
1	Lung cancer	57	0	161	56	21.6041	1	0	0	0	0	0	1	0	0	0	0	3	0	0	1	0	1	8	3	0	0	0	0	0	0	0	0	0	0	0	0	0	0	0	0	0	0	0	0	0	Conventional Oxygen Therapy	1	0
1	Lung cancer	61	1	172	63	21.2953	0	0	0	0	0	0	0	0	0	0	0	1	2	1	1	Abdominal surgery	1	8	3	1	2	Abdominal, lung	0	1	1	0	0	0	0	Carbapenems	1	0	0	0	0	0	0	1	0	0	Conventional Oxygen Therapy	1	0
2	Lung cancer	73	1	171	77	26.3329	0	0	0	0	0	0	0	0	0	0	0	3	1	1	1	Thoracic surgery	2	38	12	1	1	Lung	0	0	1	0	0	0	0	Carbapenems, β-lactams	1	1	0	0	0	0	0	1	1	2	Invasive Ventilation	0	0
2	Lung cancer	67	1	165	59.2	21.7447	0	0	0	0	0	0	0	0	0	0	0	3	0	0	1	0	2	19	4	1	1	Lung	0	0	1	0	0	0	0	Various	1	1	0	0	0	0	Quinolones	1	1	3	Invasive Ventilation	0	0
2	Lung cancer	26	0	163	65	24.4646	0	0	1	0	1	0	1	1	0	0	0	3	0	0	1	0	1	10	3	1	1	Lung	0	0	1	0	0	0	0	β-lactams	0	1	0	0	0	0	0	1	1	2	Invasive Ventilation	0	0
2	Lung cancer	65	1	180	70	21.6049	0	0	0	0	1	1	0	0	0	0	0	3	0	0	1	0	2	21	8	1	1	Pulmonary	0	0	1	0	0	0	0	Carbapenems, triazoles	1	0	0	0	0	1	0	1	1	3	Invasive Ventilation	0	0
2	Lung cancer	72	1	160	45	17.5781	0	0	1	0	1	0	1	1	0	0	0	3	0	0	1	0	2	23	3	1	3	Lung	0	0	1	0	0	0	0	β-lactams	0	1	0	0	0	0	0	1	0	0	High Flow	0	1
2	Lung cancer	71	1	178	66	20.8307	0	0	0	0	0	0	0	0	0	0	0	3	1	1	1	Thoracic surgery	2	14	2	1	2	Lung	0	0	1	0	0	0	0	β-lactams	0	1	0	0	0	0	0	1	0	0	Conventional Oxygen Therapy, High Flow	1	1
2	Lung cancer	58	0	156	42	17.2584	0	0	0	0	1	1	0	0	0	0	0	3	0	0	1	0	2	18	7	0	0	0	0	0	0	0	0	0	0	0	0	0	0	0	0	0	0	1	0	0	Conventional Oxygen Therapy	1	0
2	Lung cancer	69	1	160	66	25.7812	0	0	0	0	1	1	0	0	0	0	1	3	0	0	1	0	2	19	6	1	2	Lung	0	0	1	0	0	0	0	β-lactams	0	1	0	0	0	0	0	1	0	0	Conventional Oxygen Therapy	1	0
2	Lung cancer	59	0	156	56	23.0112	1	0	0	0	0	0	1	0	0	0	0	3	0	0	1	0	1	11	0	1	2	Lung	0	0	1	0	0	0	0	β-lactams	0	1	0	0	0	0	0	0	0	0	Conventional Oxygen Therapy	1	0
2	Lung cancer	76	1	170	73	25.2595	0	0	0	0	1	1	0	0	0	0	0	3	0	0	1	0	1	11	0	1	2	Pulmonary	0	0	1	0	0	0	0	β-lactams	0	1	0	0	0	0	0	0	0	0	Conventional Oxygen Therapy	1	0
2	Lung cancer	54	1	173	54.5	18.2098	0	0	0	0	0	0	0	0	0	0	0	3	1	1	1	Thoracic surgery	1	10	2	1	1	Lung	0	0	1	0	0	0	0	β-lactams	0	1	0	0	0	0	0	0	0	1	Conventional Oxygen Therapy	1	0
3	Lung cancer	64	1	170	63	21.7993	0	0	0	0	0	0	0	0	0	0	0	3	0	0	1	Thoracic surgery	2	17	4	1	1	Thoracic cavity, lung	1	0	1	0	0	0	0	Various	1	1	1	0	0	1	0	1	0	0	High Flow, Invasive Ventilation	0	1
3	Lung cancer	69	1	170	70	24.2215	0	0	0	0	0	0	0	0	0	0	0	3	0	0	1	0	2	13	3	1	1	Lung	0	0	1	0	0	0	0	Various	1	1	1	0	0	0	0	1	0	0	High Flow, Invasive Ventilation	0	1
3	Lung cancer	75	1	160	55	21.4844	0	0	0	0	0	0	0	0	0	0	0	1	1	1	0	Neurosurgery	2	27	6	1	2	Lung	0	0	1	0	0	0	0	Various	1	1	0	0	0	1	0	1	0	0	High Flow, Invasive Ventilation	0	1
3	Lung cancer	65	1	170	59	20.4152	0	0	1	0	1	0	1	1	0	0	0	2	0	0	1	0	2	24	10	1	1	Lung	0	0	1	0	0	0	0	Various	0	1	0	1	1	0	0	1	1	3	Non-invasive Ventilation, Invasive Ventilation	0	0
3	Left upper lobe adenocarcinoma	58	1	162	60	22.8624	0	0	0	0	0	0	0	0	0	0	1	3	0	0	1	0	1	9	3	1	3	Lung	0	0	1	0	0	0	0	β-lactams, triazoles	0	1	0	0	0	1	0	1	0	0	High Flow, Invasive Ventilation	0	1
3	Lung cancer	64	1	170	60	20.7612	0	0	0	0	0	0	0	0	0	0	0	3	0	0	1	Thoracic surgery	2	14	4	1	1	Lung	0	0	1	0	0	0	0	Various	1	1	0	0	0	0	Linezolid, Aminoglycosides	1	0	0	High Flow, Invasive Ventilation	0	1
3	Lung cancer	70	1	165	51	18.7328	0	0	0	0	0	0	0	0	0	0	0	3	0	0	1	Thoracic surgery	2	18	2	1	1	Lung	0	0	1	0	0	0	0	Various	1	0	1	0	0	1	Polymyxin	1	0	0	Conventional Oxygen Therapy, High Flow, Invasive Ventilation	1	1
3	Lung cancer	64	0	158	60	24.0346	0	0	0	1	0	0	1	1	0	0	0	3	0	0	1	0	2	25	9	1	3	Lung	0	0	1	0	0	0	0	β-lactams	0	1	0	0	0	0	0	1	0	0	Conventional Oxygen Therapy, Invasive Ventilation	1	0
3	Lung cancer	51	1	171	60	20.5191	0	0	0	0	0	0	0	0	0	0	0	3	0	0	1	0	2	18	6	1	2	Pulmonary	0	0	1	0	0	0	0	β-lactams	0	1	0	0	0	0	0	1	0	0	Conventional Oxygen Therapy, Invasive Ventilation	1	0
3	Right lung cancer	79	1	153	39	16.6603	0	0	0	0	0	0	0	0	0	0	0	3	0	0	1	0	2	18	4	1	2	Lung	0	0	1	0	0	0	0	Carbapenems, β-lactams	1	1	0	0	0	0	0	1	0	0	High Flow, Invasive Ventilation	0	1
3	Right upper lobe lung cancer	70	1	170	80	27.6817	0	0	1	0	1	0	1	1	0	0	0	3	0	0	1	Thoracic surgery	2	29	10	1	2	Lung	0	0	1	0	0	0	0	β-lactams, triazoles	0	1	0	0	0	1	0	1	0	0	Conventional Oxygen Therapy, High Flow, Invasive Ventilation	1	1
3	Lung cancer	65	1	165	56	20.5693	0	0	0	0	0	0	0	0	0	0	0	3	0	0	1	Thoracic surgery	1	6	2	1	3	Lung	0	0	1	0	0	0	0	β-lactams	0	1	0	0	0	0	0	0	0	0	Conventional Oxygen Therapy, High Flow	1	1
3	Lung cancer	72	1	174	64	21.1389	0	0	0	0	1	1	0	0	0	0	0	3	0	0	1	0	1	6	1	1	3	Lung	0	0	1	0	0	0	0	Various	1	1	1	0	1	1	Aminoglycosides	1	0	0	Conventional Oxygen Therapy, High Flow	1	1
3	Lung squamous cell carcinoma	62	1	177	84	26.8122	0	0	0	0	0	0	0	0	0	0	0	3	0	0	1	Thoracic surgery	1	3	1	1	1	Lung	0	0	1	0	0	0	0	Various	0	1	0	0	0	0	Polymyxin, Ganciclovir, Quinolones	0	0	0	Conventional Oxygen Therapy	1	0
3	Lung cancer	57	0	155	45	18.7305	0	0	0	0	0	0	0	0	0	0	0	3	0	0	1	Thoracic surgery	1	5	1	1	1	Lung, bloodstream	0	0	1	0	0	0	1	Glycopeptides, triazoles	0	0	1	0	0	1	0	0	0	0	Conventional Oxygen Therapy	1	0
3	Right lower lobe lung cancer	68	1	170	71	24.5675	0	0	1	0	1	0	1	1	0	0	0	2	0	0	1	0	1	12	2	0	0	0	0	0	0	0	0	0	0	0	0	0	0	0	0	0	0	0	0	0	Conventional Oxygen Therapy	1	0
3	Lung cancer	73	1	170	75	25.9516	0	0	0	0	1	1	0	0	0	0	0	2	0	0	1	0	1	10	2	1	3	Lung	0	0	1	0	0	0	0	β-lactams	0	1	0	0	0	0	0	0	0	0	Conventional Oxygen Therapy	1	0
3	Left lung small cell carcinoma	55	1	178	99	31.2461	0	0	1	0	1	0	1	1	0	0	1	3	0	0	1	0	2	17	5	1	3	Lung	0	0	1	0	0	0	0	β-lactams	0	1	0	0	0	0	0	0	0	0	Conventional Oxygen Therapy	1	0
3	Lung cancer	67	1	175	87	28.4082	0	0	0	0	1	1	0	0	0	0	1	3	0	0	1	0	1	7	3	1	3	Lung	0	0	1	0	0	0	0	β-lactams	0	1	0	0	0	0	0	0	0	0	Conventional Oxygen Therapy	1	0
3	Left lower lobe squamous cell carcinoma	62	1	170	60	20.7612	0	0	0	0	1	1	0	0	0	0	0	3	0	0	1	0	1	6	2	1	1	Lung	0	0	1	0	0	0	0	Various	0	1	0	0	0	0	Quinolones, Linezolid	0	0	0	Conventional Oxygen Therapy	1	0
3	Left upper lobe adenocarcinoma	49	1	172	57	19.2672	0	0	0	1	0	0	1	1	0	0	1	3	0	0	1	0	2	17	3	1	2	Lung	0	0	1	0	0	0	0	Carbapenems	1	0	0	0	0	0	0	0	0	0	Conventional Oxygen Therapy	1	0
3	Lung cancer	69	1	170	67.5	23.3564	0	0	1	0	1	0	1	1	0	0	1	3	0	0	1	0	1	12	5	1	2	Lung	0	0	1	0	0	0	0	β-lactams, polymyxins	0	1	0	0	1	0	0	1	0	0	High Flow	0	1
3	Lung cancer	43	1	172	61	20.6193	0	0	0	0	0	0	0	0	0	0	0	3	0	0	1	Thoracic surgery	1	7	2	1	3	Lung	0	0	1	0	0	0	0	β-lactams	0	1	0	0	0	0	0	0	0	0	Conventional Oxygen Therapy, High Flow	1	1
3	Lung cancer	64	1	159	58	22.9421	0	0	0	0	0	0	0	0	0	0	0	3	0	0	1	Thoracic surgery	1	4	0	1	3	Lung	0	0	1	0	0	0	0	β-lactams	0	1	0	0	0	0	0	0	0	0	Conventional Oxygen Therapy, High Flow	1	1
3	Lung cancer	69	0	164	62	23.0518	0	0	0	0	0	0	0	0	0	0	0	3	0	0	1	Thoracic surgery	1	11	2	1	2	Lung	0	0	1	0	0	0	0	Carbapenems, triazoles	1	0	0	0	0	1	0	0	0	0	Conventional Oxygen Therapy	1	0
3	Lung cancer	49	1	178	72	22.7244	1	0	0	0	0	0	1	0	0	0	0	3	0	0	1	0	1	4	1	0	0	0	0	0	0	0	0	0	0	0	0	0	0	0	0	0	0	0	0	0	Conventional Oxygen Therapy	1	0
3	Lung cancer	77	1	160	64	25	1	0	0	0	0	0	1	0	0	0	0	1	1	1	0	Thoracic surgery	1	5	1	0	0	0	0	0	0	0	0	0	0	0	0	0	0	0	0	0	0	0	0	0	Conventional Oxygen Therapy	1	0
3	Lung cancer	77	1	170	87	30.1038	0	0	0	0	0	0	0	1	0	1	0	2	0	0	1	0	2	14	2	1	2	Lung	0	0	1	0	0	0	0	β-lactams	0	1	0	0	0	0	0	0	0	0	Conventional Oxygen Therapy	1	0
3	Left upper lobe adenocarcinoma	84	1	168	67	23.7387	1	0	0	0	0	0	1	0	0	0	0	2	0	0	1	0	2	28	7	1	3	Lung	0	0	1	0	0	0	0	Various	0	1	0	0	1	0	Linezolid	1	0	0	Conventional Oxygen Therapy	1	0
3	Lung cancer	65	1	175	81	26.449	0	0	1	0	1	0	1	1	0	0	0	3	0	0	1	0	2	21	9	1	2	Lung	0	0	1	0	0	0	0	Carbapenems, glycopeptides	1	0	1	0	0	0	0	0	0	0	Conventional Oxygen Therapy	1	0
3	Lung cancer	70	0	155	66	27.4714	0	1	0	0	1	1	1	0	0	0	0	3	0	0	1	0	1	8	1	1	2	Lung	0	0	1	0	0	0	0	β-lactams	0	1	0	0	0	0	0	0	0	0	Conventional Oxygen Therapy	1	0
3	Lung squamous cell carcinoma	61	1	175	71	23.1837	0	0	0	0	1	1	0	0	0	0	1	3	0	0	1	Thoracic surgery	1	9	2	1	2	Lung	0	0	1	0	0	0	0	β-lactams, triazoles	0	1	0	0	0	1	0	0	0	0	Conventional Oxygen Therapy	1	0
3	Lung cancer	73	1	171	69	23.597	0	0	0	0	0	0	0	0	0	0	0	1	1	1	0	Thoracic surgery	1	5	2	1	1	Lung	0	0	1	0	0	0	0	β-lactams, aminoglycosides	0	1	0	0	0	0	Aminoglycosides	0	0	0	Conventional Oxygen Therapy	1	0
4	Lung cancer	57	1	159	52	20.5688	0	0	0	0	0	0	0	0	0	0	0	3	0	0	1	Thoracic surgery	2	27	11	1	1	Lung	0	0	1	0	0	0	0	β-lactams, glycopeptides	0	1	1	0	0	0	Quinolones	0	0	0	Invasive Ventilation	0	0
4	Lung cancer	57	1	159	52	20.5688	0	0	0	0	0	0	0	0	0	0	0	3	0	0	1	Interventional radiology	2	27	8	1	1	Lung	0	0	1	0	0	0	0	Various	0	1	1	0	0	0	Quinolones	1	0	0	Invasive Ventilation	0	0
4	Right lung cancer	60	1	163	63	23.7118	0	0	0	0	0	0	0	1	0	1	0	4	0	0	1	0	2	21	8	1	1	Lung	0	0	1	0	0	0	0	Various	1	1	1	0	1	0	Quinolones	1	1	2	Invasive Ventilation	0	0
4	Left lung adenocarcinoma	69	1	165	57.5	21.1203	1	0	0	0	0	0	1	0	0	0	0	3	0	0	1	Orthopedics	2	23	3	1	1	Lung, urogenital	0	0	1	0	0	1	0	Various	1	1	1	0	0	1	Quinolones	0	0	0	Conventional Oxygen Therapy, Invasive Ventilation	1	0
4	Right lung adenocarcinoma	63	0	150	55	24.4444	0	1	0	0	1	1	1	0	0	0	0	3	0	0	1	0	2	15	3	1	2	Lung	0	0	1	0	0	0	0	Various	0	1	0	0	0	1	Quinolones	1	0	0	Invasive Ventilation	0	0
4	Lung cancer	76	1	165	49	17.9982	0	0	0	0	0	0	0	0	0	0	0	3	1	1	1	Orthopedics	2	32	9	1	1	Lung	0	0	1	0	0	0	0	Carbapenems, glycopeptides, triazoles	1	0	1	0	0	1	0	1	1	1	Invasive Ventilation	0	0
4	Left lung adenocarcinoma	63	1	167	60	21.5139	0	0	0	0	1	1	0	0	0	0	0	3	0	0	1	0	2	13	4	1	1	Lung	0	0	1	0	0	0	0	Carbapenems, polymyxins	1	0	0	0	1	0	0	1	0	0	Invasive Ventilation	0	0
4	Lung squamous cell carcinoma	72	1	160	55	21.4844	0	0	0	0	1	0	0	1	1	0	0	3	0	0	1	0	2	17	6	1	2	Lung	0	0	1	0	0	0	0	Various	1	0	0	0	1	0	Quinolones	1	0	0	Conventional Oxygen Therapy	1	0
4	Lung cancer	62	1	166	60	21.7738	0	0	0	0	0	0	0	0	0	0	0	3	0	0	1	0	1	1	1	1	1	Urogenital system	0	0	0	0	0	1	0	β-lactams	0	1	0	0	0	0	Piperacillin tazobactam	1	0	0	Conventional Oxygen Therapy	1	0
5	Lung cancer	54	0	160	55	21.4844	0	0	1	0	1	0	1	1	0	0	0	2	0	0	1	Thoracic surgery	2	21	6	1	1	Lung	0	0	1	0	0	0	0	β-lactams	0	1	0	0	0	0	0	1	0	0	Conventional Oxygen Therapy, Invasive Ventilation	1	0
5	Lung cancer	75	0	150	48	21.3333	0	0	0	0	0	0	0	0	0	0	0	1	1	1	0	Thoracic surgery	2	15	6	1	3	Lung	0	0	1	0	0	0	0	β-lactams	0	1	0	0	0	0	0	1	0	0	Conventional Oxygen Therapy, High Flow, Invasive Ventilation	1	1
5	Lung cancer	62	1	170	57	19.7232	0	0	0	0	0	0	0	0	0	0	0	3	1	1	1	Thoracic surgery	1	10	2	1	3	Pulmonary, thoracic cavity	1	0	1	0	0	0	0	β-lactams, linezolid	0	1	0	0	0	0	Linezolid	0	0	0	Conventional Oxygen Therapy, High Flow	1	1
6	Lung cancer	56	1	167	85	30.478	0	0	0	0	0	0	0	0	0	0	0	3	0	0	1	0	2	17	2	1	2	Lung, bloodstream	0	0	1	0	0	0	1	Carbapenems, β-lactams	1	1	0	0	0	0	0	1	0	0	Conventional Oxygen Therapy, High Flow, Invasive Ventilation	1	1
6	Lung cancer	71	1	173	60	20.0474	0	0	0	0	0	0	0	0	0	0	0	3	0	0	1	0	2	17	2	1	2	Lung	0	0	1	0	0	0	0	Carbapenems, triazoles	1	0	0	0	0	1	0	1	0	0	Invasive Ventilation	0	0
6	Lung cancer	69	1	160	57.5	22.4609	0	0	0	0	0	0	0	0	0	0	0	3	0	0	1	0	2	25	3	1	3	Lung	0	0	1	0	0	0	0	Carbapenems	1	0	0	0	0	0	0	1	0	0	Invasive Ventilation	0	0
6	Lung cancer	57	1	175	70	22.8571	0	1	0	0	1	1	1	0	0	0	0	3	1	1	1	0	2	17	3	0	0	0	0	0	0	0	0	0	0	0	0	0	0	0	0	0	0	0	0	0	Conventional Oxygen Therapy	1	0
6	Lung cancer	64	1	174	74	24.4418	0	0	0	0	0	0	0	1	0	1	0	3	0	0	1	0	1	12	2	1	1	Lung	0	0	0	0	0	0	0	β-lactams, quinolones	0	1	0	0	0	0	Quinolones	0	0	0	Conventional Oxygen Therapy	1	0
7	Lung cancer	74	0	165	54	19.8347	0	0	0	0	0	0	0	0	0	0	0	3	1	1	1	Thoracic surgery	2	18	6	1	2	Lung	0	0	1	0	0	0	0	Carbapenems, glycopeptides	1	0	1	0	0	0	0	1	0	0	Invasive Ventilation	0	0
7	Lung cancer	55	1	179	65	20.2865	0	1	0	0	1	1	1	0	0	0	0	3	0	0	1	Internal medicine	2	20	14	1	2	Lung	0	0	1	0	0	0	0	β-lactams	0	1	0	0	0	0	0	1	0	0	Invasive Ventilation	0	0
7	Lung cancer	68	1	168	70	24.8016	0	0	0	0	0	0	0	0	0	0	0	3	1	1	1	Thoracic surgery	2	19	8	1	1	Lung	0	0	1	0	0	0	0	Various	1	0	1	0	0	1	0	1	1	3	Invasive Ventilation	0	0
7	Lung cancer	66	1	178	80	25.2493	0	0	0	0	0	0	0	0	0	0	0	3	0	0	1	Radiation therapy	2	15	3	1	1	Lung	0	0	1	0	0	0	0	Quinolones	0	0	0	0	0	0	Quinolones	1	0	0	Conventional Oxygen Therapy, High Flow	1	1
7	Lung cancer	54	0	160	46	17.9688	0	0	0	0	0	0	0	0	0	0	0	3	1	1	1	Interventional radiology	1	8	3	1	3	Lung	0	0	1	0	0	0	0	β-lactams	0	1	0	0	0	0	0	0	0	0	Conventional Oxygen Therapy	1	0
8	Lung cancer	58	1	162	50	19.052	0	0	0	0	0	0	0	0	0	0	0	1	1	1	0	Thoracic surgery	2	14	5	1	2	Thoracic cavity, bloodstream	1	0	0	0	0	0	1	Various	1	0	0	0	0	1	Linezolid	0	0	0	Conventional Oxygen Therapy, Invasive Ventilation	1	0
8	Lung cancer	57	1	169	62	21.7079	0	0	0	0	1	0	0	1	1	0	0	3	0	0	1	0	2	16	4	1	2	Abdominal, lung, bloodstream	0	1	1	0	0	0	1	Various	1	0	0	0	0	0	Linezolid, Quinolones	0	0	0	Conventional Oxygen Therapy	1	0
9	Lung cancer	63	1	155	54.8	22.8096	0	0	0	0	1	1	0	0	0	0	1	3	0	0	1	Radiation therapy	2	24	9	1	1	Lung	0	0	1	0	0	0	0	Various	1	0	0	0	0	1	Linezolid	1	1	3	Invasive Ventilation	0	0
9	Lung cancer	65	1	165	51	18.7328	0	0	0	0	0	0	0	0	0	0	0	3	0	0	1	Thoracic surgery	1	10	3	1	1	Lung	0	0	1	0	0	0	0	Carbapenems, glycopeptides	1	0	1	0	0	0	0	1	1	2	Conventional Oxygen Therapy, Non-invasive Ventilation, Invasive Ventilation	1	0
9	Lung cancer	68	1	161	66.6	25.6935	0	0	0	0	0	0	0	0	0	0	0	1	1	1	0	Thoracic surgery	1	7	1	0	0	0	0	0	0	0	0	0	0	β-lactams	0	1	0	0	0	0	0	0	0	0	Conventional Oxygen Therapy	1	0
9	Lung cancer	66	1	162	62.4	23.7769	0	0	0	0	0	0	0	0	0	0	0	3	1	1	0	Thoracic surgery	1	6	3	0	0	0	0	0	0	0	0	0	0	0	0	0	0	0	0	0	0	0	0	0	Conventional Oxygen Therapy	1	0
9	Lung cancer	69	0	163	80	30.1103	0	0	0	0	0	0	0	0	0	0	0	3	1	1	1	Thoracic surgery	2	13	3	1	1	Lung	0	0	1	0	0	0	0	β-lactams, triazoles	0	1	0	0	0	1	0	1	1	2	High Flow, Non-invasive Ventilation	0	1
9	Lung cancer	67	1	160	40.2	15.7031	0	0	0	0	0	0	0	0	0	0	0	3	0	0	1	Thoracic surgery	1	9	2	1	1	Lung	0	0	1	0	0	0	0	Carbapenems, triazoles	1	0	0	0	0	1	Quinolones	1	1	2	Conventional Oxygen Therapy, Non-invasive Ventilation	1	0
9	Lung cancer	76	0	155	80	33.2986	0	0	0	0	0	0	0	0	0	0	0	3	0	0	1	Interventional radiology	1	7	3	1	3	Lung	0	0	1	0	0	0	0	β-lactams	0	1	0	0	0	0	0	0	0	0	Conventional Oxygen Therapy	1	0
9	Lung cancer	63	1	151	50	21.9289	0	0	0	0	0	0	0	0	0	0	0	1	1	1	0	Thoracic surgery	1	9	2	0	0	0	0	0	0	0	0	0	0	0	0	0	0	0	0	0	0	1	0	0	Conventional Oxygen Therapy, High Flow	1	1
9	Lung cancer	72	0	160.5	63.7	24.728	0	0	0	0	0	0	0	0	0	0	0	1	1	1	0	Thoracic surgery	1	9	0	0	0	0	0	0	0	0	0	0	0	0	0	0	0	0	0	0	0	1	0	0	Conventional Oxygen Therapy, High Flow	1	1
9	Lung cancer	71	1	160.5	57.1	22.1659	0	0	0	0	0	0	0	0	0	0	0	1	1	1	0	Thoracic surgery	1	10	5	1	3	Lung	0	0	1	0	0	0	0	β-lactams	0	1	0	0	0	0	0	1	0	0	Conventional Oxygen Therapy, High Flow	1	1
9	Lung cancer	74	0	152	46.9	20.2995	0	0	0	0	0	0	0	0	0	0	0	1	1	1	0	Thoracic surgery	2	18	4	1	2	Lung	0	0	1	0	0	0	0	Quinolones	0	0	0	0	0	0	Quinolone class	1	0	0	Conventional Oxygen Therapy, High Flow	1	1
11	Lung cancer	61	0	158	55	22.0317	1	0	0	0	0	0	1	0	0	0	0	3	0	0	1	0	2	17	8	1	2	Lung	0	0	1	0	0	0	0	Carbapenems	1	0	0	0	0	0	0	1	0	0	Invasive Ventilation	0	0
11	Lung cancer	83	1	168	51	18.0697	1	0	0	0	0	0	1	0	0	0	0	3	0	0	1	0	2	16	3	1	3	Lung	0	0	1	0	0	0	0	β-lactams, carbapenems, tigecycline	1	1	0	1	0	0	0	1	0	0	Conventional Oxygen Therapy, Invasive Ventilation	1	0
11	Lung cancer	80	1	168	55	19.487	0	0	0	0	0	0	0	0	0	0	0	3	0	0	1	0	2	30	14	1	2	Lung	0	0	1	0	0	0	0	Carbapenems, tigecycline	1	0	0	1	0	0	0	1	0	0	Invasive Ventilation	0	0
11	Lung cancer	72	1	170	66	22.8374	0	0	0	0	1	1	0	0	0	0	0	4	0	0	1	0	2	22	10	1	3	Abdominal	0	1	0	0	0	0	0	Carbapenems, tigecycline	1	0	0	1	0	0	0	0	0	0	Conventional Oxygen Therapy	1	0
11	Lung cancer	73	1	172	70	23.6614	1	0	0	0	0	0	1	0	0	0	0	3	0	0	1	0	2	30	14	1	2	Lung	0	0	1	0	0	0	0	Various	1	0	0	1	0	0	Polymyxin, Linezolid	1	0	0	Conventional Oxygen Therapy, Invasive Ventilation	1	0
11	Lung cancer	71	1	165	66	24.2424	1	0	0	0	0	0	1	0	0	0	0	3	0	0	1	0	1	11	4	1	3	Lung	0	0	1	0	0	0	0	Carbapenems	1	0	0	0	0	0	0	0	0	0	Conventional Oxygen Therapy	1	0
12	Lung cancer	83	1	167	48	17.2111	0	0	0	0	1	1	0	0	0	0	0	3	0	0	1	0	2	26	6	1	2	Lung	0	0	1	0	0	0	0	β-lactams	0	1	0	0	0	0	0	1	1	1	Conventional Oxygen Therapy, Invasive Ventilation	1	0
12	Lung cancer	59	0	154	60	25.2994	0	0	1	0	1	0	1	1	0	0	0	3	0	0	1	0	1	11	8	1	1	Lung	0	0	1	0	0	0	0	β-lactams	0	1	0	0	0	0	0	1	1	3	Conventional Oxygen Therapy, High Flow, Invasive Ventilation	1	1
12	Lung cancer	58	1	156	48	19.7239	0	0	0	0	0	0	0	0	0	0	0	3	0	0	1	Radiation therapy	2	15	2	0	0	0	0	0	0	0	0	0	0	0	0	0	0	0	0	0	0	1	1	1	Conventional Oxygen Therapy, High Flow, Invasive Ventilation	1	1
12	Lung cancer	61	1	164	55	20.4491	0	0	0	0	0	0	0	0	0	0	0	3	0	0	1	0	1	8	3	0	0	0	0	0	0	0	0	0	0	0	0	0	0	0	0	0	0	0	0	0	Conventional Oxygen Therapy	1	0
12	Lung cancer	51	1	164	56	20.8209	0	0	0	0	1	1	0	0	0	0	0	1	1	1	0	Thoracic surgery	1	9	2	0	0	0	0	0	0	0	0	0	0	0	0	0	0	0	0	0	0	1	0	0	Conventional Oxygen Therapy, Invasive Ventilation	1	0
12	Lung cancer	74	1	168	71	25.1559	0	0	0	0	0	0	0	0	0	0	0	1	1	1	0	Thoracic surgery	1	9	0	0	0	0	0	0	0	0	0	0	0	0	0	0	0	0	0	0	0	0	0	0	Conventional Oxygen Therapy, Invasive Ventilation	1	0
12	Lung cancer	69	1	157	61	24.7475	0	0	0	0	1	1	0	0	0	0	0	3	1	1	0	Thoracic surgery	1	8	2	1	2	Lung	0	0	1	0	0	0	0	β-lactams	0	1	0	0	0	0	0	1	1	1	Conventional Oxygen Therapy, High Flow, Invasive Ventilation	1	1
12	Lung cancer	73	1	164	53	19.7055	0	0	0	0	0	0	0	0	0	0	0	1	1	1	0	Abdominal surgery	1	7	0	0	0	0	0	0	0	0	0	0	0	0	0	0	0	0	0	0	0	0	0	0	Conventional Oxygen Therapy, Invasive Ventilation	1	0
12	Lung cancer	50	1	169	58	20.3074	0	0	0	0	0	0	0	0	0	0	0	1	1	1	0	Thoracic surgery	1	7	0	0	0	0	0	0	0	0	0	0	0	0	0	0	0	0	0	0	0	0	0	0	Conventional Oxygen Therapy, Invasive Ventilation	1	0
12	Lung cancer	78	1	161	63.5	24.4975	0	0	0	0	1	1	0	0	0	0	0	3	0	0	1	Thoracic surgery	2	17	0	1	1	Lung	0	0	1	0	0	0	0	β-lactams	0	1	0	0	0	0	0	1	0	0	Conventional Oxygen Therapy, High Flow	1	1
12	Lung cancer	61	1	162	60.5	23.0529	0	0	0	0	0	0	0	0	0	0	0	3	1	1	1	Thoracic surgery	2	16	4	1	1	Lung	0	0	1	0	0	0	0	β-lactams	0	1	0	0	0	0	0	1	1	3	Conventional Oxygen Therapy, High Flow	1	1
12	Lung cancer	51	0	150	35	15.5556	0	0	0	0	0	0	0	0	0	0	0	3	0	0	1	0	2	20	0	1	2	Lung	0	0	1	0	0	0	0	β-lactams	0	1	0	0	0	0	0	1	0	0	Conventional Oxygen Therapy	1	0
13	Lung cancer	83	0	160	73	28.5156	1	0	0	0	0	0	1	0	0	0	0	3	0	0	1	0	2	34	9	1	2	Lung	0	0	1	0	0	0	0	Carbapenems, β-lactams	1	1	0	0	0	0	0	1	0	0	Conventional Oxygen Therapy, Invasive Ventilation	1	0
13	Lung cancer	67	1	166	90	32.6608	0	0	0	0	0	0	0	0	0	0	0	3	0	0	0	0	2	17	13	1	3	Lung, gastrointestinal	0	0	1	1	0	0	0	Carbapenems, β-lactams	1	1	0	0	0	0	Linezolid	1	1	2	Invasive Ventilation	0	0
13	Lung cancer	52	1	168	72	25.5102	1	0	0	0	0	0	1	0	0	0	0	3	0	0	1	0	1	12	3	1	3	Lung	0	0	1	0	0	0	0	β-lactams, quinolones	0	1	0	0	0	0	Quinolones	1	1	2	Invasive Ventilation	0	0
13	Lung cancer	62	1	182	81	24.4536	0	0	0	0	1	0	0	1	1	0	0	3	0	0	1	0	1	9	2	1	1	Lung	0	0	0	0	0	0	0	Various	1	1	0	0	1	1	0	1	0	0	High Flow, Non-invasive Ventilation, Invasive Ventilation	0	1
13	Lung cancer	50	1	158	71	28.441	1	0	0	0	0	0	1	0	0	0	0	3	0	0	1	0	1	11	4	1	1	Lung, urogenital system	0	0	1	0	0	1	0	Various	1	1	0	0	0	1	Linezolid	1	1	2	High Flow, Non-invasive Ventilation, Invasive Ventilation	0	1
13	Lung cancer	63	1	168	69	24.4473	0	0	0	0	0	0	0	0	0	0	0	3	0	0	1	0	2	16	10	1	1	Lung	0	0	1	0	0	0	0	β-lactams, quinolones	0	1	0	0	0	0	Quinolones	1	1	3	Invasive Ventilation	0	0
13	Lung cancer	65	1	168	73	25.8645	0	0	0	0	0	0	0	0	0	0	0	1	1	1	0	Thoracic surgery	1	9	2	1	3	Lung	0	0	1	0	0	0	0	β-lactams	0	1	0	0	0	0	0	0	0	0	Conventional Oxygen Therapy, Invasive Ventilation	1	0
13	Lung cancer	80	1	167	75	26.8923	0	0	0	0	0	0	0	0	0	0	0	3	0	0	1	Thoracic surgery	1	11	3	1	1	Lung	0	0	1	0	0	0	0	β-lactams	0	1	0	0	0	0	0	0	0	0	Conventional Oxygen Therapy	1	0
13	Lung cancer	55	1	169	72	25.2092	0	0	0	0	0	0	0	0	0	0	0	3	0	0	1	0	2	13	3	1	2	Lung	0	0	1	0	0	0	0	β-lactams	0	1	0	0	0	0	0	0	0	0	Conventional Oxygen Therapy	1	0
13	Lung cancer	71	0	150	46	20.4444	0	0	0	0	0	0	0	0	0	0	0	3	0	0	1	0	1	12	4	1	1	Lung	0	0	1	0	0	0	0	Various	1	0	0	0	0	1	Linezolid	1	0	0	Non-invasive Ventilation	0	0
13	Lung cancer	52	1	170	70	24.2215	0	0	0	0	1	0	0	1	1	0	0	3	0	0	1	0	2	14	5	1	3	Lung	0	0	1	0	0	0	0	β-lactams	0	1	0	0	0	0	0	0	0	0	Conventional Oxygen Therapy, High Flow	1	1
13	Lung cancer	55	0	160	56	21.875	1	0	0	0	0	0	1	0	0	0	1	3	0	0	1	0	2	13	9	1	3	Lung	0	0	1	0	0	0	0	Carbapenems	1	0	0	0	0	0	0	0	0	0	High Flow	0	1
13	Lung cancer	48	1	170	74	25.6055	0	0	0	0	1	1	0	0	0	0	0	3	0	0	1	0	2	17	5	1	2	Lung, gastroenteritis	0	0	1	1	0	0	0	Various	1	0	1	0	0	1	0	0	0	0	Conventional Oxygen Therapy	1	0
13	Lung cancer	80	0	155	66	27.4714	0	0	0	0	0	0	0	0	0	0	0	3	0	0	1	0	2	19	3	1	3	Lung	0	0	1	0	0	0	0	β-lactams	0	1	0	0	0	0	0	1	0	0	Conventional Oxygen Therapy	1	0
14	Lung cancer	65	1	163	57	21.4536	0	0	0	0	0	0	0	0	0	0	0	3	1	1	1	Thoracic surgery	2	13	3	1	1	Lung, bloodstream	0	0	1	0	0	0	1	Various	1	1	0	1	1	0	Quinolones, Polymyxin	1	1	2	Conventional Oxygen Therapy, High Flow, Invasive Ventilation	1	1
14	Lung cancer	73	1	167	74	26.5338	0	0	0	0	0	0	0	0	0	0	0	3	1	1	1	Thoracic surgery	2	16	9	1	1	Lung, bloodstream	0	0	1	0	0	0	1	Various	1	1	1	1	1	0	Quinolones, Polymyxin	1	1	1	High Flow, Invasive Ventilation	0	1
14	Lung cancer	67	0	160	47	18.3594	0	0	0	0	0	0	0	0	0	0	0	1	1	1	1	Thoracic surgery	2	21	15	0	0	0	0	0	0	0	0	0	0	0	0	0	0	0	0	0	0	1	1	2	Invasive Ventilation	0	0
14	Lung cancer	64	1	157	54	21.9076	0	0	0	0	1	1	0	0	0	0	0	3	1	1	1	Thoracic surgery	2	14	2	1	3	Lung	0	0	1	0	0	0	0	Quinolones	0	0	0	0	0	0	Quinolones	0	1	1	Conventional Oxygen Therapy, Invasive Ventilation	1	0
14	Lung cancer	75	0	159	59	23.3377	0	0	0	0	0	0	0	0	0	0	0	3	1	1	1	Thoracic surgery	2	17	0	1	3	Lung	0	0	1	0	0	0	0	β-lactams	0	1	0	0	0	0	0	1	0	0	Conventional Oxygen Therapy, High Flow	1	1
14	Lung cancer	67	1	170	72	24.9135	0	0	0	0	1	0	0	1	1	0	0	3	0	0	1	0	1	11	4	1	1	Lung, bloodstream	0	0	1	0	0	0	1	Tigecycline, colistin	0	0	0	1	0	1	Colistin sulfate	1	0	0	Conventional Oxygen Therapy, High Flow	1	1
14	Lung cancer	33	1	183	62	18.5135	0	0	1	0	1	0	1	1	0	0	1	2	0	0	1	0	1	5	6	0	0	0	0	0	0	0	0	0	0	0	0	0	0	0	0	0	0	0	0	0	Conventional Oxygen Therapy	1	0
14	Lung cancer	58	0	153	51	21.7865	1	0	0	0	0	0	1	0	0	0	0	3	0	0	1	0	1	5	2	0	0	0	0	0	0	0	0	0	0	0	0	0	0	0	0	0	0	0	0	0	Conventional Oxygen Therapy	1	0
14	Lung cancer	57	1	165	77	28.2828	0	0	0	0	1	0	0	1	1	0	0	3	0	0	1	Early clinical	1	11	4	1	3	Lung	0	0	1	0	0	0	0	Carbapenems, glycopeptides	1	0	1	0	0	0	0	0	0	0	Conventional Oxygen Therapy	1	0
15	Lung cancer	72	1	161	52	20.061	0	0	0	0	0	0	0	0	0	0	0	2	1	1	1	Thoracic surgery	1	10	1	1	1	Thoracic cavity, lung	1	0	1	0	0	0	0	Various	1	0	0	0	1	0	Linezolid	1	1	1	High Flow, Invasive Ventilation	0	1
15	Right lung adenocarcinoma	65	1	162	45.7	17.4135	0	0	0	0	1	1	0	0	0	0	1	3	0	0	1	0	2	32	14	1	1	Lung	0	0	1	0	0	0	0	Carbapenems, triazoles	1	0	0	0	0	1	0	1	1	2	Invasive Ventilation	0	0
15	Lung cancer	76	1	171	68	23.255	0	0	0	0	0	0	0	0	0	0	0	3	0	0	1	0	1	11	6	1	2	Lung	0	0	1	0	0	0	0	Carbapenems	1	0	0	0	0	0	Quinolones	0	0	0	Conventional Oxygen Therapy, High Flow, Non-invasive Ventilation, Invasive Ventilation	1	1
15	Lung cancer	58	0	161	49	18.9036	0	1	0	0	1	1	1	0	0	0	0	3	0	0	1	0	2	23	12	1	1	Lung	0	0	1	0	0	0	0	Various	1	0	0	0	0	1	Quinolones	1	1	2	High Flow, Invasive Ventilation	0	1
15	Lung cancer	76	1	161	60	23.1473	0	0	0	0	0	0	0	0	0	0	0	1	1	1	0	Thoracic surgery	1	12	10	0	0	0	0	0	0	0	0	0	0	β-lactams	0	1	0	0	0	0	0	0	0	0	Conventional Oxygen Therapy, High Flow, Invasive Ventilation	1	1
15	Lung cancer	46	0	153	48	20.5049	0	1	0	0	1	1	1	0	0	0	0	3	0	0	1	0	2	25	16	0	0	0	0	0	0	0	0	0	0	0	0	0	0	0	0	0	0	1	1	2	Invasive Ventilation	0	0
15	Lung cancer	76	1	172	62	20.9573	0	0	0	0	0	0	0	0	0	0	0	3	1	1	1	Orthopedics	2	16	9	1	2	Lung	0	0	1	0	0	0	0	Carbapenems, triazoles	1	0	0	0	0	1	0	1	0	0	Conventional Oxygen Therapy, High Flow, Non-invasive Ventilation	1	1
15	Lung cancer	53	1	161	55	21.2183	0	1	0	0	1	1	1	0	0	0	0	3	0	0	1	0	2	15	3	1	1	Lung	0	0	1	0	0	0	0	Carbapenems, linezolid	1	0	0	0	0	0	Linezolid	1	0	0	High Flow	0	1
15	Lung cancer	70	1	153	40	17.0874	0	0	0	0	1	0	0	1	1	0	0	3	0	0	1	0	2	21	6	1	2	Lung	0	0	1	0	0	0	0	Carbapenems, polymyxins	1	0	0	0	1	0	0	1	0	0	Conventional Oxygen Therapy, High Flow	1	1
15	Lung cancer	71	1	163.5	62.5	23.38	0	0	0	0	0	0	0	0	0	0	0	3	1	1	1	Thoracic surgery	1	12	6	1	1	Lung	0	0	1	0	0	0	0	Carbapenems, linezolid	1	0	0	0	0	0	Linezolid	1	0	0	Conventional Oxygen Therapy, High Flow	1	1
15	Lung cancer	45	1	170	72	24.9135	0	0	0	0	1	1	0	0	0	0	0	2	0	0	1	0	2	26	9	0	0	0	0	0	0	0	0	0	0	0	0	0	0	0	0	0	0	0	0	0	Conventional Oxygen Therapy, High Flow	1	1
18	Lung cancer with brain metastasis	45	0	158	45	18.026	1	0	0	0	0	0	1	0	0	0	0	3	2	1	1	Neurosurgery	2	55	5	0	0	0	0	0	0	0	0	0	0	0	0	0	0	0	0	0	0	0	0	0	Conventional Oxygen Therapy, Invasive Ventilation	1	0
18	Right lung cancer	56	1	172	72	24.3375	0	0	0	0	0	0	0	0	0	0	0	1	1	1	1	Thoracic surgery	2	15	1	1	3	Lung	0	0	1	0	0	0	0	β-lactams	0	1	0	0	0	0	0	1	1	2	Conventional Oxygen Therapy, Invasive Ventilation	1	0
18	Lung cancer	45	1	165	63	23.1405	0	0	0	0	0	0	0	0	0	0	0	2	0	0	1	0	2	17	6	1	3	Lung	0	0	1	0	0	0	0	β-lactams	0	1	0	0	0	0	0	1	0	0	Conventional Oxygen Therapy, Invasive Ventilation	1	0
18	Invasive adenocarcinoma of the right lower lobe lung	55	0	157	56	22.719	0	0	0	0	0	0	0	0	0	0	0	1	1	1	0	Thoracic surgery	1	9	0	0	0	0	0	0	0	0	0	0	0	0	0	0	0	0	0	0	0	0	0	0	Conventional Oxygen Therapy, Invasive Ventilation	1	0
18	Lung cancer	55	0	165	67	24.6097	0	0	0	0	0	0	0	0	0	0	0	1	1	1	0	Neurosurgery	2	15	6	1	3	Lung	0	0	1	0	0	0	0	β-lactams	0	1	0	0	0	0	0	1	1	2	Invasive Ventilation	0	0
18	Right lung adenocarcinoma	77	0	149	40	18.0172	1	0	0	0	0	0	1	0	0	0	0	3	0	0	1	0	1	12	1	1	1	Lung	0	0	1	0	0	0	0	β-lactams, triazoles	0	1	0	0	0	1	0	0	0	0	Conventional Oxygen Therapy	1	0
18	Left lung adenocarcinoma	57	0	155	45	18.7305	0	1	0	0	1	1	1	0	0	0	0	2	0	0	1	0	2	13	5	1	2	Lung	0	0	1	0	0	0	0	Carbapenems, triazoles	1	0	0	0	0	1	0	0	0	0	Conventional Oxygen Therapy, High Flow	1	1
19	Lung cancer	68	0	161	56	21.6041	0	0	0	0	0	0	0	0	0	0	0	3	1	1	1	Thoracic surgery	2	15	6	1	2	Lung	0	0	1	0	0	0	0	Triazoles, carbapenems, glycopeptides	1	0	1	0	0	1	0	0	0	0	Conventional Oxygen Therapy, Invasive Ventilation	1	0
19	Lung cancer	72	0	157	53	21.5019	0	0	0	0	0	0	0	0	0	0	0	1	1	1	0	Thoracic surgery	1	8	2	0	0	0	0	0	0	0	0	0	0	0	0	0	0	0	0	0	0	0	0	0	Conventional Oxygen Therapy	1	0
19	Lung cancer	78	0	151	52	22.806	0	0	0	0	0	0	0	0	0	0	0	1	1	1	0	Thoracic surgery	1	8	1	1	3	Lung	0	0	1	0	0	0	0	Carbapenems	1	0	0	0	0	0	0	0	0	0	Conventional Oxygen Therapy	1	0
19	Lung cancer	72	1	167	92	32.9879	0	0	0	0	0	0	0	0	0	0	0	1	1	1	1	Thoracic surgery	1	11	2	1	3	Lung	0	0	1	0	0	0	0	Carbapenems, β-lactams	1	1	0	0	0	0	0	0	0	0	Conventional Oxygen Therapy	1	0
19	Lung cancer	59	0	161	66	25.462	0	0	0	0	0	0	0	0	0	0	0	3	1	1	1	Thoracic surgery	1	9	6	0	0	0	0	0	0	0	0	0	0	0	0	0	0	0	0	0	0	0	0	0	Conventional Oxygen Therapy	1	0
19	Lung cancer	20	1	181	71	21.6721	0	0	0	0	1	1	0	0	0	0	0	1	1	1	0	Thoracic surgery	1	3	1	0	0	0	0	0	0	0	0	0	0	0	0	0	0	0	0	0	0	0	0	0	Conventional Oxygen Therapy	1	0
19	Lung cancer	52	1	166	67	24.3141	0	0	0	0	0	0	0	0	0	0	0	1	1	1	0	Thoracic surgery	1	5	2	0	0	0	0	0	0	0	0	0	0	0	0	0	0	0	0	0	0	0	0	0	Conventional Oxygen Therapy	1	0
19	Lung cancer	75	1	173	77	25.7276	0	0	0	0	0	0	0	0	0	0	0	1	1	1	0	Thoracic surgery	1	6	2	0	0	0	0	0	0	0	0	0	0	0	0	0	0	0	0	0	0	0	0	0	Conventional Oxygen Therapy	1	0
19	Lung cancer	58	1	167	70	25.0995	0	0	0	0	0	0	0	0	0	0	0	1	1	1	0	Thoracic surgery	1	6	3	0	0	0	0	0	0	0	0	0	0	0	0	0	0	0	0	0	0	0	0	0	Conventional Oxygen Therapy	1	0
19	Lung cancer	64	1	168	77	27.2817	0	0	0	0	0	0	0	0	0	0	0	1	1	1	0	Thoracic surgery	1	7	3	0	0	0	0	0	0	0	0	0	0	0	0	0	0	0	0	0	0	0	0	0	Conventional Oxygen Therapy	1	0
19	Lung cancer	67	0	154	70	29.5159	0	0	0	0	0	0	0	0	0	0	0	1	1	1	0	Thoracic surgery	1	9	3	0	0	0	0	0	0	0	0	0	0	0	0	0	0	0	0	0	0	0	0	0	Conventional Oxygen Therapy	1	0
19	Lung cancer	76	0	156	50	20.5457	0	0	0	0	0	0	0	0	0	0	0	1	1	1	0	Thoracic surgery	1	11	1	0	0	0	0	0	0	0	0	0	0	0	0	0	0	0	0	0	0	0	0	0	Conventional Oxygen Therapy	1	0
19	Lung cancer	81	0	161	57	21.9899	0	0	0	0	0	0	0	0	0	0	0	1	1	1	0	Thoracic surgery	2	14	2	0	0	0	0	0	0	0	0	0	0	0	0	0	0	0	0	0	0	0	0	0	Conventional Oxygen Therapy	1	0
19	Lung cancer	63	1	173	67	22.3863	0	0	0	0	0	0	0	0	0	0	0	1	1	1	0	Thoracic surgery	1	10	4	0	0	0	0	0	0	0	0	0	0	00	0	0	0	0	0	0	0	0	0	0	Conventional Oxygen Therapy	1	0
19	Lung cancer	71	1	170	69	23.8754	0	0	0	0	0	0	0	0	0	0	0	1	1	1	0	Thoracic surgery	1	5	1	1	3	Lung	0	0	1	0	0	0	0	β-lactams	0	1	0	0	0	0	0	0	0	0	Conventional Oxygen Therapy	1	0
19	Lung cancer	70	1	175	74	24.1633	0	0	0	0	0	0	0	0	0	0	0	1	1	1	0	Thoracic surgery	1	8	2	1	2	Lung	0	0	1	0	0	0	0	β-lactams, triazoles	0	1	0	0	0	1	0	0	0	0	Conventional Oxygen Therapy	1	0
20	Lung cancer	62	1	168	45	15.9439	0	0	0	0	0	0	0	1	0	1	1	3	0	0	1	Pulmonology	1	9	6	1	2	Pulmonary	0	0	1	0	0	0	0	Carbapenems	1	0	0	0	0	0	0	1	1	1	Invasive Ventilation, Conventional Oxygen Therapy, High Flow	1	1
21	Right lung cancer	68	1	176	77	24.858	1	0	0	0	0	0	1	0	0	0	0	1	1	1	0	Thoracic surgery	2	22	9	1	1	Lung	0	0	1	0	0	0	0	Carbapenems	1	0	0	0	0	0	0	1	0	0	Conventional Oxygen Therapy, High Flow, Invasive Ventilation	1	1
21	Lung cancer	71	0	158	71	28.441	0	0	0	0	0	0	0	0	0	0	0	3	1	1	1	Thoracic surgery	2	19	6	0	0	0	0	0	0	0	0	0	0	0	0	0	0	0	0	0	0	1	0	0	Invasive Ventilation, High Flow, Conventional Oxygen Therapy	1	1
21	Lung cancer	68	0	163	77.5	29.1693	0	0	0	0	0	0	0	0	0	0	0	1	1	1	0	Thoracic surgery	1	11	4	1	1	Lung	0	0	1	0	0	0	0	Carbapenems	0	0	0	0	0	0	0	1	0	0	Conventional Oxygen Therapy, High Flow, Invasive Ventilation	1	1
21	Lung cancer	65	0	160	55	21.4844	0	0	0	0	0	0	0	0	0	0	0	1	1	1	0	Thoracic surgery	1	10	5	0	0	0	0	0	0	0	0	0	0	0	0	0	0	0	0	0	0	0	0	0	Conventional Oxygen Therapy	1	0
21	Lung cancer	47	0	165	76	27.9155	0	0	0	0	0	0	0	0	0	0	0	1	1	1	0	Orthopedics	1	12	3	0	0	0	0	0	0	0	0	0	0	0	0	0	0	0	0	0	0	0	0	0	Conventional Oxygen Therapy	1	0
21	Lung cancer	60	1	175	92	30.0408	0	0	0	0	0	0	0	0	0	0	0	1	1	1	0	Thoracic surgery	1	8	3	0	0	0	0	0	0	0	0	0	0	0	0	0	0	0	0	0	0	0	0	0	Conventional Oxygen Therapy	1	0
21	Lung cancer	68	0	160	98	38.2812	0	0	0	0	0	0	0	0	0	0	0	1	1	1	0	Thoracic surgery	1	10	1	0	0	0	0	0	0	0	0	0	0	0	0	0	0	0	0	0	0	0	0	0	Conventional Oxygen Therapy	1	0
21	Lung cancer	63	0	152	55	23.8054	1	0	0	0	0	0	1	0	0	0	0	1	1	1	0	Thoracic surgery	1	7	2	0	0	0	0	0	0	0	0	0	0	0	0	0	0	0	0	0	0	0	0	0	Conventional Oxygen Therapy	1	0
21	Lung cancer, breast cancer	49	0	162	60	22.8624	0	0	0	0	0	0	0	0	0	0	0	1	1	1	0	Thoracic surgery	1	8	0	0	0	0	0	0	0	0	0	0	0	0	0	0	0	0	0	0	0	0	0	0	Conventional Oxygen Therapy	1	0
21	Lung cancer	48	0	158	70	28.0404	0	0	0	0	0	0	0	0	0	0	0	1	1	1	0	Thoracic surgery	1	9	3	1	3	Thoracic cavity	1	0	0	0	0	0	0	β-lactams	0	1	0	0	0	0	0	0	0	0	Conventional Oxygen Therapy	1	0
21	Lung cancer	65	0	165	61	22.4059	0	0	0	0	0	0	0	0	0	0	0	1	1	1	0	Thoracic surgery	1	12	1	0	0	0	0	0	0	0	0	0	0	0	0	0	0	0	0	0	0	0	0	0	Conventional Oxygen Therapy	0	0
22	Lung cancer	65	1	180	60	18.5185	0	0	0	0	1	1	0	0	0	0	0	3	1	1	1	Thoracic surgery	2	17	8	1	1	Lung	0	0	1	0	0	0	0	Various	1	1	0	1	1	0	0	1	0	0	Invasive Ventilation	0	0
22	Lung cancer	57	0	160	60	23.4375	0	0	0	0	0	0	0	0	0	0	0	3	1	1	0	Orthopedics	1	10	0	0	0	0	0	0	0	0	0	0	0	0	0	0	0	0	0	0	0	0	0	0	Conventional Oxygen Therapy	1	0
22	Lung cancer	67	1	160	54	21.0938	0	0	0	0	0	0	0	0	0	0	0	3	1	1	1	Thoracic surgery	1	7	4	1	2	Lung	0	0	1	0	0	0	0	β-lactams	0	1	0	0	0	0	0	0	0	0	Conventional Oxygen Therapy	1	0
23	Lung cancer	67	1	165	45	16.5289	0	0	0	0	0	0	0	0	0	0	0	3	0	0	1	0	2	18	3	1	3	Lung	0	0	1	0	0	0	0	β-lactams, quinolones	1	0	0	0	0	0	Quinolones	1	0	3	Non-invasive Ventilation, Invasive Ventilation	0	0
23	Lung cancer	62	1	162	54	20.5761	0	0	0	0	1	1	0	0	0	0	0	3	0	0	1	0	2	19	12	1	2	Thoracic cavity	1	0	0	0	0	0	0	Various	1	0	1	0	0	1	0	1	1	2	Conventional Oxygen Therapy, Invasive Ventilation	1	0
23	Right lung adenocarcinoma	64	0	160	70	27.3438	0	0	0	0	0	0	0	0	0	0	0	3	0	0	1	Thoracic surgery	1	10	1	1	3	Lung	0	0	1	0	0	0	0	β-lactams	0	1	0	0	0	0	0	0	0	0	Conventional Oxygen Therapy, High Flow	1	1
23	Lung cancer	66	1	168	53	18.7783	0	0	0	0	0	0	0	0	0	0	0	3	1	1	0	Thoracic surgery	1	7	0	0	0	0	0	0	0	0	0	0	0	0	0	0	0	0	0	0	0	0	0	0	Conventional Oxygen Therapy, High Flow	1	1
23	Lung cancer	73	1	175	83	27.102	0	0	0	0	0	0	0	0	0	0	0	1	1	1	0	Thoracic surgery	1	8	2	0	0	0	0	0	0	0	0	0	0	0	0	0	0	0	0	0	0	0	0	0	Conventional Oxygen Therapy, High Flow	1	1
23	Lung adenocarcinoma	66	0	162	67	25.5296	0	0	0	0	0	0	0	0	0	0	0	1	1	1	0	Thoracic surgery	1	9	0	0	0	0	0	0	0	0	0	0	0	0	0	0	0	0	0	0	0	0	0	0	Conventional Oxygen Therapy, High Flow	1	1
23	Lung cancer	77	0	156	40	16.4366	0	0	0	1	0	0	1	1	0	0	0	4	0	0	1	0	2	18	2	1	2	Lung	0	0	1	0	0	0	0	Quinolones, tetracyclines	0	0	0	0	0	0	Quinolones, Tetracyclines	1	0	0	Conventional Oxygen Therapy, High Flow	1	1
23	Lung cancer	59	1	178	84.5	26.6696	0	0	0	0	1	0	0	1	1	0	1	3	0	0	1	0	2	13	3	1	2	Lung	0	0	1	0	0	0	0	Various	0	1	0	0	0	0	SMZ, Lincomycin	0	1	2	Conventional Oxygen Therapy, High Flow	1	1
25	Lung cancer	45	0	175	80	26.1224	0	0	0	0	1	0	0	1	1	0	0	3	0	0	1	0	2	27	10	1	3	Lung	0	0	1	0	0	0	0	Carbapenems	1	0	0	0	0	0	0	1	1	2	Invasive Ventilation	0	0
25	Lung cancer	72	1	178	70	22.0932	0	0	0	0	1	1	0	0	0	0	1	3	0	0	1	0	2	22	8	1	3	Lung	0	0	1	0	0	0	0	Carbapenems, triazoles	1	0	0	0	0	1	0	1	1	2	Conventional Oxygen Therapy, Non-invasive Ventilation	1	0
27	Lung cancer	55	0	175	82	26.7755	0	0	0	0	0	0	0	0	0	0	0	3	1	1	1	Thoracic surgery	2	15	5	1	2	Lung	0	0	1	0	0	0	0	Various	1	1	0	0	0	0	Linezolid	1	1	3	Conventional Oxygen Therapy, Invasive Ventilation	1	0
27	Lung cancer	67	1	188	105	29.708	0	0	0	0	0	0	0	0	0	0	0	1	1	1	0	Abdominal surgery	2	13	6	0	0	0	0	0	0	0	0	0	0	0	0	0	0	0	0	0	0	1	0	0	Conventional Oxygen Therapy, Invasive Ventilation	1	0
27	Lung cancer	61	1	171	63	21.5451	0	0	0	0	0	0	0	0	0	0	0	1	1	1	0	Thoracic surgery	1	5	2	0	0	0	0	0	0	0	0	0	0	0	0	0	0	0	0	0	0	0	0	0	Conventional Oxygen Therapy	1	0
27	Lung cancer	59	1	167	105	37.6493	0	0	0	0	0	0	0	0	0	0	0	1	1	1	0	Thoracic surgery	1	4	1	0	0	0	0	0	0	0	0	0	0	0	0	0	0	0	0	0	0	0	0	0	Conventional Oxygen Therapy	1	0
27	Lung cancer	61	1	176	75	24.2123	0	0	0	0	0	0	0	0	0	0	0	1	1	1	0	Thoracic surgery	1	7	1	0	0	0	0	0	0	0	0	0	0	0	0	0	0	0	0	0	0	0	0	0	Conventional Oxygen Therapy	1	0
27	Lung cancer	57	1	172	72	24.3375	0	0	0	0	0	0	0	0	0	0	0	1	1	1	0	Thoracic surgery	1	7	2	0	0	0	0	0	0	0	0	0	0	0	0	0	0	0	0	0	0	0	0	0	Conventional Oxygen Therapy	1	0
27	Lung cancer	73	1	160	48	18.75	0	0	0	0	0	0	0	0	0	0	0	1	1	1	0	Thoracic surgery	1	7	2	0	0	0	0	0	0	0	0	0	0	0	0	0	0	0	0	0	0	0	0	0	Conventional Oxygen Therapy	1	0
27	Lung cancer	70	0	160	72	28.125	0	0	0	0	0	0	0	0	0	0	0	1	1	1	0	Thoracic surgery	1	9	1	0	0	0	0	0	0	0	0	0	0	0	0	0	0	0	0	0	0	0	0	0	Conventional Oxygen Therapy	1	0
27	Lung cancer	66	0	163	60	22.5827	0	0	0	0	0	0	0	0	0	0	0	1	1	1	0	Thoracic surgery	1	9	0	0	0	0	0	0	0	0	0	0	0	0	0	0	0	0	0	0	0	0	0	0	Conventional Oxygen Therapy	1	0
27	Lung cancer	66	0	153	55	23.4952	0	0	0	0	0	0	0	0	0	0	0	1	1	1	0	Thoracic surgery	2	13	7	0	0	0	0	0	0	0	0	0	0	0	0	0	0	0	0	0	0	0	0	0	Conventional Oxygen Therapy	1	0
27	Right upper lobe lung cancer	68	0	160	60	23.4375	0	0	0	0	0	0	0	0	0	0	0	3	1	1	0	Thoracic surgery	1	7	2	0	0	0	0	0	0	0	0	0	0	0	0	0	0	0	0	0	0	0	0	0	Conventional Oxygen Therapy	1	0
27	Left upper lobe lung cancer	67	0	153	54	23.0681	0	0	0	0	0	0	0	0	0	0	0	1	1	1	0	Thoracic surgery	1	7	0	0	0	0	0	0	0	0	0	0	0	0	0	0	0	0	0	0	0	0	0	0	Conventional Oxygen Therapy	1	0
27	Left upper lobe lung cancer	72	1	158	58	23.2335	0	0	0	0	0	0	0	0	0	0	0	3	1	1	1	Thoracic surgery	1	9	2	0	0	0	0	0	0	0	0	0	0	0	0	0	0	0	0	0	0	0	0	0	Conventional Oxygen Therapy	1	0
27	Lung cancer	58	1	169	74	25.9095	0	0	0	0	0	0	0	0	0	0	0	1	1	1	0	Thoracic surgery	1	3	1	0	0	0	0	0	0	0	0	0	0	0	0	0	0	0	0	0	0	0	0	0	Conventional Oxygen Therapy	1	0
27	Lung cancer	54	1	177	90	28.7274	0	0	0	0	0	0	0	0	0	0	0	1	1	1	0	Thoracic surgery	1	6	1	0	0	0	0	0	0	0	0	0	0	0	0	0	0	0	0	0	0	0	0	0	Conventional Oxygen Therapy	1	0
27	Lung cancer	65	1	172	71	23.9995	0	0	0	0	0	0	0	0	0	0	0	1	1	1	0	Thoracic surgery	1	7	1	0	0	0	0	0	0	0	0	0	0	0	0	0	0	0	0	0	0	0	0	0	Conventional Oxygen Therapy	1	0
27	Lung cancer	68	0	158	75	30.0433	0	0	0	0	0	0	0	0	0	0	0	1	1	1	0	Thoracic surgery	1	11	1	0	0	0	0	0	0	0	0	0	0	0	0	0	0	0	0	0	0	0	0	0	Conventional Oxygen Therapy	1	0
27	Lung cancer	56	1	160	48	18.75	0	0	0	0	0	0	0	0	0	0	0	1	1	1	0	Thoracic surgery	1	8	2	1	3	Lung	0	0	0	0	0	0	0	β-lactams, cephalosporins	0	1	0	0	0	0	Ceftazidime	0	0	0	Conventional Oxygen Therapy	1	0
27	Lung cancer	63	1	166	60	21.7738	0	0	0	0	0	0	0	0	0	0	0	1	1	1	0	Thoracic surgery	1	3	3	0	0	0	0	0	0	0	0	0	0	0	0	0	0	0	0	0	0	0	0	0	Conventional Oxygen Therapy	1	0
28	Lung cancer	62	1	170	62	21.4533	0	0	0	0	0	0	0	0	0	0	0	3	0	0	1	0	2	27	11	1	3	Pulmonary, bloodstream	0	0	1	0	0	0	1	β-lactams, glycopeptides	0	1	1	0	0	0	0	1	0	0	Invasive Ventilation	0	0
28	Lung cancer	61	0	150	43	19.1111	0	0	0	0	0	0	0	0	0	0	0	3	0	0	1	0	2	14	2	1	3	Lung	0	0	1	0	0	0	0	Various	0	1	1	0	1	0	Quinolones	1	0	0	Conventional Oxygen Therapy, High Flow, Invasive Ventilation	1	1
28	Lung adenocarcinoma	71	0	163	65	24.4646	0	1	0	0	1	1	1	0	0	0	0	2	0	0	1	0	2	20	8	1	3	Abdominal	0	1	0	0	0	0	0	Carbapenems, glycopeptides	1	0	1	0	0	0	0	1	0	0	Conventional Oxygen Therapy, High Flow	1	1
28	Lung cancer	51	0	176	69	22.2753	0	0	0	0	1	1	0	0	0	0	0	3	0	0	1	0	2	25	9	1	3	Pulmonary, urogenital	0	0	1	0	0	1	0	Quinolones	0	0	0	0	0	0	Quinolones	1	0	0	High Flow	0	1
28	Lung cancer	62	1	165	61	22.4059	1	0	0	0	0	0	1	0	0	0	0	3	0	0	1	0	1	11	2	1	3	Pulmonary, bloodstream	0	0	1	0	0	0	1	Various	0	1	1	0	0	1	Quinolones	1	0	0	Conventional Oxygen Therapy, High Flow	1	1
28	Lung cancer	47	0	155	47	19.563	0	1	0	0	1	1	1	0	0	0	0	3	0	0	1	0	2	19	4	0	0	0	0	0	0	0	0	0	0	0	0	0	0	0	0	0	0	0	0	0	Conventional Oxygen Therapy	1	0
28	Lung cancer	71	1	185	80	23.3747	0	0	0	0	1	1	0	0	0	0	0	3	0	0	1	0	2	22	4	1	3	Blood	0	0	0	0	0	0	1	β-lactams, glycopeptides	0	1	1	0	0	0	0	0	0	0	Conventional Oxygen Therapy	1	0
31	Lung cancer	51	1	170	60	20.7612	0	0	0	0	0	0	0	0	0	0	0	3	0	0	1	0	2	28	15	1	1	Lung	0	0	1	0	0	0	0	β-lactams, tigecycline	0	1	0	1	0	0	0	1	1	2	Conventional Oxygen Therapy, Invasive Ventilation	1	0
31	Lung cancer	56	1	178	70	22.0932	0	0	0	0	0	0	0	0	0	0	0	3	1	1	1	Interventional radiology	1	9	2	1	2	Lung	0	0	1	0	0	0	0	β-lactams	0	1	0	0	0	0	0	0	0	0	Invasive Ventilation	0	0
31	Lung cancer	68	1	170	58	20.0692	0	0	0	0	0	0	0	0	0	0	0	3	1	1	1	Thoracic surgery	1	11	4	1	2	Lung	0	0	1	0	0	0	0	β-lactams	0	1	0	0	0	0	0	0	0	0	Conventional Oxygen Therapy, Invasive Ventilation	1	0
31	Lung cancer	71	1	175	60	19.5918	0	0	0	0	0	0	0	0	0	0	0	3	1	1	1	Thoracic surgery	1	11	3	1	1	Lung	0	0	1	0	0	0	0	β-lactams, polymyxins	0	1	0	0	1	0	0	1	0	0	Conventional Oxygen Therapy, High Flow	1	1
31	Lung cancer	70	1	174	84	27.7447	0	0	0	0	1	1	0	0	0	0	0	3	0	0	1	0	2	14	2	0	0	0	0	0	0	0	0	0	0	0	0	0	0	0	0	0	0	0	0	0	Conventional Oxygen Therapy	1	0
31	Lung cancer	72	1	173	55	18.3768	0	0	0	0	0	0	0	0	0	0	0	3	0	0	1	0	2	17	8	1	2	Lung	0	0	1	0	0	0	0	β-lactams	0	1	0	0	0	0	0	0	0	0	Conventional Oxygen Therapy	1	0
31	Lung cancer	69	1	175	60	19.5918	0	0	0	0	0	0	0	0	0	0	0	3	0	0	1	0	2	13	2	0	0	0	0	0	0	0	0	0	0	0	0	0	0	0	0	0	0	0	0	0	Conventional Oxygen Therapy	1	0
32	Lung cancer	48	0	158	45	18.026	1	0	0	0	0	0	1	0	0	0	0	4	0	0	0	0	1	10	8	1	1	Pulmonary, urogenital system	0	0	1	0	0	1	0	β-lactams, triazoles, quinolones	0	1	0	0	0	1	Quinolones	0	0	0	Invasive Ventilation	0	0
32	Lung cancer	52	1	168	50	17.7154	0	0	0	0	1	0	0	1	1	0	0	3	0	0	1	0	2	17	12	1	2	Lung	0	0	1	0	0	0	0	Various	1	0	1	0	0	1	0	1	1	3	Invasive Ventilation	0	0
32	Lung cancer	56	0	156	36	14.7929	1	0	0	0	0	0	1	0	0	0	0	2	0	0	1	0	1	12	4	1	3	Lung, bloodstream	0	0	1	0	0	0	1	Carbapenems, β-lactams	1	1	0	0	0	0	0	1	1	2	Invasive Ventilation	0	0
32	Lung cancer	71	0	158	37.5	15.0216	0	0	0	0	0	0	0	0	0	0	0	3	0	0	1	0	2	28	7	1	1	Lung	0	0	1	0	0	0	0	Various	1	0	1	0	0	1	0	1	1	1	Invasive Ventilation	0	0
32	Gum cancer, lung cancer, breast cancer	67	0	157	52	21.0962	0	0	0	0	1	0	0	1	1	0	1	3	0	0	1	0	2	22	3	1	1	Lung	0	0	1	0	0	0	0	Various	1	1	0	0	1	0	0	1	0	0	Conventional Oxygen Therapy, High Flow	1	1
32	Lung cancer	79	1	170	55	19.0311	0	0	0	0	0	0	0	0	0	0	0	3	0	0	1	0	2	15	4	1	1	Lung	0	0	1	0	0	0	0	β-lactams	0	1	0	0	0	0	0	0	0	0	High Flow	0	1
32	Lung cancer	85	1	151	42.9	18.815	0	0	0	0	0	0	0	0	0	0	0	3	1	1	1	Thoracic surgery	1	10	4	1	2	Lung	0	0	1	0	0	0	0	Carbapenems, linezolid	1	0	0	0	0	0	Linezolid	0	0	0	Conventional Oxygen Therapy	1	0
32	Lung cancer	51	1	168	69	24.4473	0	0	0	0	1	1	0	0	0	0	0	3	0	0	1	0	1	9	3	1	1	Bloodstream	0	0	0	0	0	0	1	β-lactams, glycopeptides	0	1	1	0	0	0	0	0	0	0	Conventional Oxygen Therapy	1	0
32	Lung cancer	51	1	160	61	23.8281	0	0	0	0	0	0	0	0	0	0	0	3	0	0	1	0	1	7	2	1	2	Abdominal	0	1	0	0	0	0	0	Carbapenems	1	0	0	0	0	0	0	0	0	0	Conventional Oxygen Therapy	1	0
32	Lung cancer with brain metastasis	38	1	156	46	18.902	0	0	1	0	1	0	1	1	0	0	1	3	0	0	1	0	2	25	7	1	1	Lung	0	0	1	0	0	0	0	β-lactams	0	1	0	0	0	0	0	0	0	0	0	0	0
33	Lung cancer	65	1	172	62	20.9573	0	0	0	0	0	0	0	1	0	1	0	1	2	1	1	0	2	25	2	1	1	Lung	0	0	1	0	0	0	0	β-lactams, carbapenems	1	1	0	0	0	0	0	1	1	2	Invasive Ventilation	0	0
33	Lung cancer	65	1	165	60	22.0386	0	0	0	0	1	1	0	0	0	0	0	3	0	0	1	0	2	18	4	1	1	Lung	0	0	1	0	0	0	0	Various	0	1	1	0	1	0	0	1	0	0	Invasive Ventilation	0	0
33	Lung cancer	57	1	160	55	21.4844	0	0	0	0	1	1	0	0	0	0	0	3	0	0	1	0	2	16	2	1	3	Lung	0	0	1	0	0	0	0	β-lactams, quinolones	0	1	0	0	0	0	Quinolones	1	0	0	Non-invasive Ventilation, Invasive Ventilation	0	0
33	Lung cancer	68	1	161	53	20.4467	0	0	0	0	0	0	0	0	0	0	0	3	0	0	1	0	2	19	2	1	3	Lung	0	0	1	0	0	0	0	β-lactams, quinolones	0	1	0	0	0	0	Quinolones	1	0	0	Invasive Ventilation	0	0
33	Lung cancer	72	1	170	55	19.0311	0	0	0	0	0	0	0	0	0	0	0	3	0	0	1	0	2	17	6	1	3	Lung	0	0	1	0	0	0	0	β-lactams	0	1	0	0	0	0	0	1	0	0	High Flow, Non-invasive Ventilation, Invasive Ventilation	0	1
33	Lung cancer	58	1	172	65	21.9713	1	0	0	0	0	0	1	0	0	0	0	3	0	0	1	0	2	16	2	1	1	Lung	0	0	1	0	0	0	0	β-lactams	0	1	0	0	0	0	0	0	0	0	Conventional Oxygen Therapy, High Flow	1	1
34	Lung cancer	65	1	178	60	18.937	0	0	0	0	1	0	0	1	1	0	0	3	0	0	1	0	2	16	10	1	1	Lung	0	0	1	0	0	0	0	Various	1	0	1	0	0	1	0	1	0	0	High Flow, Non-invasive Ventilation	0	1
34	Lung cancer	71	0	155	59	24.5578	0	0	0	0	0	0	0	0	0	0	0	1	1	1	0	Thoracic surgery	1	10	5	0	0	0	0	0	0	0	0	0	0	β-lactams	0	1	0	0	0	0	0	1	1	2	Conventional Oxygen Therapy, High Flow, Invasive Ventilation	1	1
34	Lung cancer	64	1	174	53	17.5056	0	0	1	0	1	0	1	1	0	0	0	2	2	1	1	0	2	27	19	1	2	Lung	0	0	1	0	0	0	0	β-lactams	0	1	0	0	0	0	0	1	1	3	Invasive Ventilation	0	0
34	Lung cancer	78	1	175	64	20.898	0	0	0	0	1	0	0	1	1	0	0	3	0	0	1	0	2	21	5	1	1	Lung	0	0	1	0	0	0	0	Various	0	1	1	0	0	1	0	1	0	0	High Flow	0	1
34	Lung cancer	57	1	163	67	25.2174	0	0	0	0	0	0	0	0	0	0	0	3	1	1	0	Thoracic surgery	1	10	2	0	0	0	0	0	0	0	0	0	0	0	0	0	0	0	0	0	0	0	0	0	Conventional Oxygen Therapy	1	0
34	Lung cancer	63	1	175	65	21.2245	0	0	0	0	0	0	0	0	0	0	0	1	1	1	0	Thoracic surgery	1	12	1	0	0	0	0	0	0	0	0	0	0	β-lactams	0	1	0	0	0	0	0	0	0	0	Conventional Oxygen Therapy	1	0
34	Lung cancer	81	1	175	55	17.9592	1	0	0	0	0	0	1	0	0	0	0	4	0	0	0	0	2	17	3	1	1	Lung	0	0	1	0	0	0	0	β-lactams, quinolones	0	1	0	0	0	0	Quinolones	0	0	0	High Flow	0	1
35	Lung cancer	81	0	160	75	29.2969	1	0	0	0	0	0	1	0	0	0	0	2	0	0	1	0	2	26	5	1	1	Lung	0	0	1	0	0	0	0	Various	1	1	0	0	0	1	Amphotericin B	1	1	2	Conventional Oxygen Therapy, Non-invasive Ventilation, Invasive Ventilation	1	0
36	Lung cancer	76	1	170	60	20.7612	0	0	0	0	1	0	0	1	1	0	0	2	0	0	1	0	2	19	3	1	2	Lung	0	0	1	0	0	0	0	Carbapenems, β-lactams, tigecycline	1	1	1	1	0	1	0	1	1	3	Conventional Oxygen Therapy, Invasive Ventilation	1	0
36	Lung cancer	43	0	166	60	21.7738	0	0	0	0	0	0	0	0	0	0	0	3	0	0	1	0	1	8	3	0	0	0	0	0	0	0	0	0	0	0	0	0	0	0	0	0	0	0	0	0	Conventional Oxygen Therapy	1	0
36	Lung cancer	68	1	168	40	14.1723	0	0	0	0	1	1	0	0	0	0	0	3	0	0	1	0	2	15	10	1	2	Lung	0	0	1	0	0	0	0	Various	1	1	0	0	0	1	0	1	0	0	Invasive Ventilation	0	0
36	Esophageal cancer, lung cancer	64	1	167	62	22.231	0	0	0	0	1	0	0	1	1	0	0	1	1	1	0	Thoracic surgery	1	11	3	1	2	Lung	0	0	1	0	0	0	0	Carbapenems, glycopeptides	1	0	1	0	0	0	0	1	0	0	Conventional Oxygen Therapy, Invasive Ventilation	1	0
36	Lung cancer	78	1	170	65	22.4913	0	0	0	0	0	0	0	0	0	0	0	3	1	1	1	Thoracic surgery	2	17	3	1	1	Lung	0	0	1	0	0	0	0	β-lactams	0	1	0	0	0	0	0	1	0	0	Conventional Oxygen Therapy, Invasive Ventilation	1	0
36	Lung cancer	65	1	175	70	22.8571	0	0	0	0	1	1	0	0	0	0	0	3	0	0	1	0	2	24	3	1	2	Lung	0	0	1	0	0	0	0	β-lactams, glycopeptides	0	1	1	0	0	0	0	1	0	0	Invasive Ventilation	0	0
36	Lung cancer	39	1	178	62.4	19.6945	0	0	1	0	1	0	1	1	0	0	0	4	0	0	1	0	2	14	2	1	2	Lung	0	0	1	0	0	0	0	β-lactams	0	1	0	0	0	0	0	1	1	1	Invasive Ventilation	0	0
36	Right lung cancer	74	1	170	48	16.609	0	0	0	0	0	0	0	0	0	0	0	4	0	0	0	0	1	7	9	1	2	Pulmonary	0	0	1	0	0	0	0	β-lactams	0	1	0	0	0	0	0	1	0	0	Conventional Oxygen Therapy, High Flow	1	1
36	Lung cancer	60	1	176	63	20.3383	0	0	0	0	1	0	0	1	1	0	0	3	0	0	1	0	1	10	1	1	2	Lung	0	0	1	0	0	0	0	β-lactams	0	1	0	0	0	0	0	0	0	0	Conventional Oxygen Therapy	1	0
36	Lung cancer	41	0	160	46	17.9688	0	0	0	0	0	0	0	0	0	0	0	4	0	0	0	0	1	7	0	1	1	Lung	0	0	1	0	0	0	0	β-lactams	0	1	0	0	0	0	0	0	0	0	Conventional Oxygen Therapy	1	0
36	Lung cancer	67	1	170	40	13.8408	0	0	0	0	1	1	0	0	0	0	0	3	0	0	1	0	2	24	9	1	1	Biliary tract, blood	0	0	0	0	0	0	1	Carbapenems, glycopeptides	1	0	1	0	0	0	0	0	0	0	Conventional Oxygen Therapy	1	0
36	Lung cancer	70	1	165	70	25.7117	0	0	0	0	0	0	0	0	0	0	0	3	0	0	1	0	1	10	3	0	0	0	0	0	0	0	0	0	0	0	0	0	0	0	0	0	0	0	0	0	Conventional Oxygen Therapy	1	0
36	Lung cancer	81	1	178	55	17.3589	0	0	0	0	1	1	0	0	0	0	0	3	0	0	1	0	1	10	3	1	1	Lung, blood	0	0	1	0	0	0	1	Various	1	0	1	0	0	1	0	0	0	0	Conventional Oxygen Therapy	1	0
37	Lung cancer	65	0	156	60	24.6548	1	0	0	0	0	0	1	0	0	0	1	3	0	0	1	0	2	38	12	1	2	Lung	0	0	1	0	0	0	0	Carbapenems, glycopeptides, triazoles	1	0	1	0	0	1	0	1	1	3	Invasive Ventilation	0	0
37	Lung cancer	84	1	170	60	20.7612	0	1	0	0	1	1	1	0	0	0	0	3	0	0	1	0	2	25	11	1	1	Lung	0	0	1	0	0	0	0	Carbapenems, triazoles	1	0	0	0	0	1	0	1	1	3	Invasive Ventilation	0	0
37	Lung cancer	60	1	168	60	21.2585	0	0	0	0	1	1	0	0	0	0	0	3	0	0	1	0	2	36	10	1	2	Lung	0	0	1	0	0	0	0	β-lactams, triazoles	0	1	0	0	0	1	0	1	1	2	Invasive Ventilation	0	0
37	Lung cancer	57	1	165	70	25.7117	0	0	0	0	1	1	0	0	0	0	1	3	0	0	1	0	2	21	3	1	2	Lung	0	0	1	0	0	0	0	β-lactams	0	1	0	0	0	0	0	1	0	0	Conventional Oxygen Therapy, Invasive Ventilation	1	0
37	Lung cancer	71	1	155	47	19.563	0	0	0	0	0	0	0	0	0	0	0	3	0	0	1	0	2	26	8	1	2	Lung	0	0	1	0	0	0	0	Carbapenems, glycopeptides	1	0	1	0	0	0	0	1	1	0	High Flow, Non-invasive Ventilation	0	1
37	Lung cancer	72	1	162	56	21.3382	0	0	0	0	0	0	0	0	0	0	0	3	0	0	1	0	2	27	3	1	2	Lung	0	0	1	0	0	0	0	β-lactams	0	1	0	0	0	0	0	1	1	2	Conventional Oxygen Therapy, High Flow, Invasive Ventilation	1	1
37	Lung cancer	63	1	169	60	21.0077	0	0	0	0	0	0	0	0	0	0	0	3	1	1	1	Thoracic surgery	2	34	15	1	2	Lung	0	0	1	0	0	0	0	Various	1	0	0	0	0	1	Linezolid	1	1	3	Invasive Ventilation	0	0
37	Lung cancer	45	0	150	52	23.1111	1	0	0	0	0	0	1	0	0	0	0	3	0	0	1	0	1	12	5	1	2	Lung	0	0	1	0	0	0	0	β-lactams, triazoles	0	1	0	0	0	1	0	1	1	3	Non-invasive Ventilation	0	0
37	Lung cancer	42	1	160	55	21.4844	0	0	0	0	0	0	0	0	0	0	0	3	1	1	1	Thoracic surgery	2	15	8	1	2	Lung	0	0	1	0	0	0	0	Carbapenems, linezolid	1	0	0	0	0	0	Linezolid	1	1	3	Invasive Ventilation	0	0
37	Lung cancer	67	0	167	62	22.231	0	0	0	0	0	0	0	0	0	0	0	3	0	0	1	Thoracic surgery	2	21	9	1	2	Lung	0	0	1	0	0	0	0	β-lactams	0	1	0	0	0	0	0	1	1	2	Conventional Oxygen Therapy, High Flow, Invasive Ventilation	1	1
37	Lung cancer	82	1	158	67	26.8386	0	0	0	0	0	0	0	0	0	0	1	3	0	0	1	0	2	25	11	1	1	Lung	0	0	1	0	0	0	0	Carbapenems, glycopeptides	1	0	1	0	0	0	0	1	0	0	Conventional Oxygen Therapy, High Flow	1	1
37	Lung cancer	70	1	168	70	24.8016	0	0	0	0	0	0	0	0	0	0	0	1	1	1	0	Thoracic surgery	1	12	2	1	2	Lung	0	0	1	0	0	0	0	β-lactams	0	1	0	0	0	0	0	1	0	0	Conventional Oxygen Therapy, High Flow	1	1
37	Lung cancer	60	1	170	65	22.4913	0	0	0	0	1	1	0	0	0	0	0	3	0	0	1	0	2	20	7	1	2	Gastroenteritis, lung	0	0	1	1	0	0	0	Carbapenems	1	0	0	0	0	0	0	1	0	0	Conventional Oxygen Therapy, High Flow	1	1
37	Lung cancer	62	1	175	56	18.2857	0	0	0	0	1	1	0	0	0	0	0	3	0	0	1	0	2	28	6	1	2	Lung	0	0	1	0	0	0	0	Carbapenems, glycopeptides	1	0	1	0	0	0	0	0	0	0	Conventional Oxygen Therapy, High Flow	1	1
37	Lung cancer	71	1	165	59	21.6713	0	0	0	0	0	0	0	0	0	0	0	3	0	0	1	0	2	15	3	1	1	Lung	0	0	1	0	0	0	0	Carbapenems	1	0	0	0	0	0	0	1	0	0	Conventional Oxygen Therapy, High Flow	1	1
37	Lung cancer	51	1	165	60	22.0386	0	0	0	0	1	1	0	0	0	0	0	3	0	0	1	0	2	21	6	1	1	Lung	0	0	1	0	0	0	0	Carbapenems, quinolones	1	0	0	0	0	0	Quinolones	1	0	0	Conventional Oxygen Therapy, High Flow	1	1
[truncated: 65 more columns]
